EXPRESSION OF CONCERN

## Expression of Concern: Trends, gender, and racial disparities in patients with mortality due to paroxysmal tachycardia: A nationwide analysis from 1999–2020

The *PLOS One* Editors

The *PLOS One* Editors issue this Expression of Concern to alert readers that this article [1] was identified as one of a series of submissions for which we have concerns about authorship and adherence to the journal's first and second publication criteria [2]. We regret that these issues were not addressed prior to the article's publication.

### References

1. Goyal A, Saeed H, Yamin S, Abdullah, Sultan W, Arshad MK, et al. Trends, gender, and racial disparities in patients with mortality due to paroxysmal tachycardia: A nationwide analysis from 1999–2020. *PLoS One*. 2025;20(2):e0314715. <https://doi.org/10.1371/journal.pone.0314715> PMID: 39903690
2. PLOS One. Criteria for Publication [Internet] Available from: <https://journals.plos.org/plosone/s/criteria-for-publication> [Accessed March 2026]

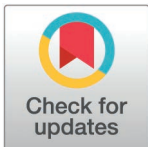

### OPEN ACCESS

**Citation:** The *PLOS One* Editors (2026) Expression of Concern: Trends, gender, and racial disparities in patients with mortality due to paroxysmal tachycardia: A nationwide analysis from 1999–2020. *PLoS One* 21(4): e0346401. <https://doi.org/10.1371/journal.pone.0346401>

**Published:** April 6, 2026

**Copyright:** © 2026 The *PLOS One* Editors. This is an open access article distributed under the terms of the [Creative Commons Attribution License](https://creativecommons.org/licenses/by/4.0/), which permits unrestricted use, distribution, and reproduction in any medium, provided the original author and source are credited.
